# Supplementary material for: Alteration of Gut Immunity and Microbiome in Mixed Granulocytic Asthma
Source: MDPI journal article supplement (doi:10.3390/biomedicines10112946), 2022-11-16
Supplement: s1 [file s1]

## Supplementary Data

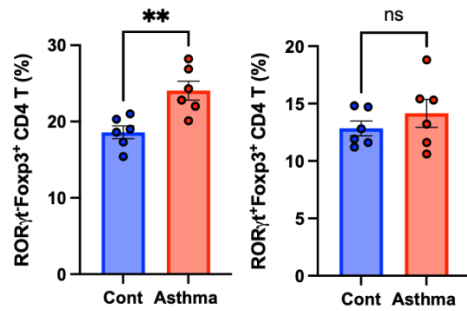

Supplementary Figure S1. Frequency of RORγtFoxp3<sup>+</sup> CD4 T cell and RORγtFoxp3<sup>+</sup> CD4 T cell subsets gated on CD3 in the colon.

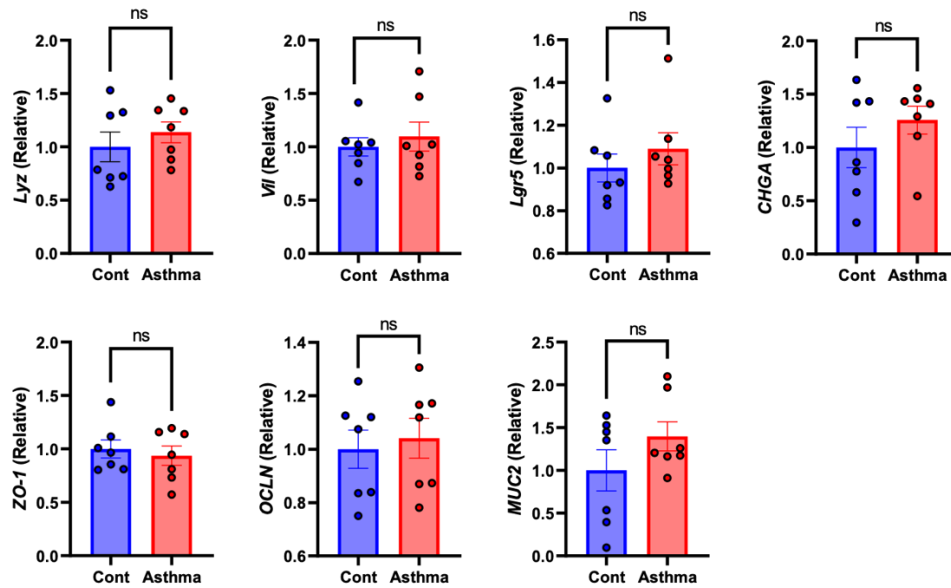

Supplementary Figure S2. Relative expression of genes for intestinal epithelial cell markers and tight junction; lysozyme (Lyz), villin (Vil), leucine-rich repeat-containing G-protein coupled receptor 5 (Lgr5), chromogranin A (CHGA), zonula occludens-1 (ZO-1), occluding (OCLN), and mucin 2 (MUC2).
